# Supplementary material
Source: publisher figshare collection journal article supplement (https://gsajournals.figshare.com/ndownloader/files/16628189)
Supplement: Supplementary file 1 [file 16628189]

## Sheet: Sheet1
Supplemental Table 1. Specifications on sequenced clones from this study. Sample=strain ID; Environment=media or condition for evolution; Background=ancestor genotype (HHL=SSP309; LHL=SSP272); Run=sequencing core run #; CoreID=unique sequencing core ID; Barcode=dual Illumina barcodes used; Number of Reads=paired reads per sample; Theoretical coverage=estimated sequencing depth assuming 100 bp of …
Sample	Environment	Background	Run #	# Lanes	CoreID	Barcode	Number of Reads	Theoretical coverage
AB-100-2	Beer	SSP309	1630	2	69478	ACTCGCTA+TCGACTAG	21146575	352.443
AB-100-3	Beer	SSP309	1630	2	66866	ACTCGCTA+TTCTAGCT	18535471	308.925
AB-100-4	Beer	SSP309	1630	2	69479	CCTAAGAC+CCTAGAGT	10398392	173.307
AB-100-6	Beer	SSP309	1630	2	69481	ACTCGCTA+CTATTAAG	8938324	148.972
AB-100-7	Beer	SSP309	1630	2	67941	ACTCGCTA+AAGGCTAT	15535192	258.92
AC-100-1	Canavanine	SSP309	1828	1	80530	CGGAGCCT+GAGCCTTA	13644818	227.414
AC-100-2	Canavanine	SSP309	1630	2	69483	ACTCGCTA+TTATGCGA	9531766	158.863
AC-100-3	Canavanine	SSP309	1828	1	77941	TCGACGTC+TCGACTAG	11982179	199.703
AC-100-4	Canavanine	SSP309	1630	2	66874	GGAGCTAC+TTCTAGCT	5376841	89.614
AC-100-5	Canavanine	SSP309	1630	2	69489	GGAGCTAC+TCGACTAG	9264446	154.407
AC-100-6	Canavanine	SSP309	1630	2	66876	GGAGCTAC+GCGTAAGA	12371366	206.189
AN-100-1	NaCl	SSP309	1630	2	69486	GGAGCTAC+CTATTAAG	9931494	165.525
AN-100-3	NaCl	SSP309	1630	2	67942	GGAGCTAC+GAGCCTTA	8475069	141.251
AN-100-4	NaCl	SSP309	1630	2	69488	GGAGCTAC+TTATGCGA	15726934	262.116
AN-100-5	NaCl	SSP309	1630	2	69485	GGAGCTAC+CCTAGAGT	11693962	194.899
AN-100-7	NaCl	SSP309	1630	2	66882	GCGTAGTA+TTCTAGCT	6339996	105.667
AW-100-1	Wine	SSP309	1630	2	69490	GCGTAGTA+CCTAGAGT	7869086	131.151
AW-100-2	Wine	SSP309	1630	2	66884	GCGTAGTA+GCGTAAGA	13423227	223.72
AW-100-3	Wine	SSP309	1630	2	66885	GCGTAGTA+CTATTAAG	10527816	175.464
AW-100-4	Wine	SSP309	1828	1	80532	GCGTAGTA+AAGGCTAT	16315629	271.927
AW-100-6	Wine	SSP309	1630	2	66888	GCGTAGTA+TTATGCGA	12252836	204.214
AY-100-1	YPD	SSP309	1630	2	66889	CGGAGCCT+TCGACTAG	12035900	200.598
AY-100-2	YPD	SSP309	1630	2	66890	CGGAGCCT+TTCTAGCT	19175391	319.59
AY-100-3	YPD	SSP309	1630	2	66891	CGGAGCCT+CCTAGAGT	4968094	82.8016
AY-100-4	YPD	SSP309	1630	2	66892	CGGAGCCT+GCGTAAGA	5462418	91.0403
AY-100-5	YPD	SSP309	1630	2	66893	CGGAGCCT+CTATTAAG	10452639	174.211
AY-100-6	YPD	SSP309	1630	2	66894	CGGAGCCT+AAGGCTAT	5249135	87.4856
BB-100-3	Beer	SSP272	1828	1	77943	TCGACGTC+CCTAGAGT	10173794	169.563
BB-100-5	Beer	SSP272	1630	2	66897	TACGCTGC+TCGACTAG	11829177	197.153
BB-100-6	Beer	SSP272	1630	2	66898	TACGCTGC+TTCTAGCT	14235840	237.264
BB-100-7	Beer	SSP272	1630	2	66899	TACGCTGC+CCTAGAGT	11866695	197.778
BB-100-8	Beer	SSP272	1630	2	66900	TACGCTGC+GCGTAAGA	13848280	230.805
BC-100-3	Canavanine	SSP272	1630	2	66901	TACGCTGC+CTATTAAG	10858607	180.977
BC-100-4	Canavanine	SSP272	1630	2	66902	TACGCTGC+AAGGCTAT	10776663	179.611
BC-100-5	Canavanine	SSP272	1630	2	66903	TACGCTGC+GAGCCTTA	14814441	246.907
BC-100-6	Canavanine	SSP272	1630	2	66904	TACGCTGC+TTATGCGA	11281528	188.025
BC-100-7	Canavanine	SSP272	1630	2	66905	ATGCGCAG+TCGACTAG	6217992	103.633
BC-100-8	Canavanine	SSP272	1630	2	69494	ATGCGCAG+TTCTAGCT	18866799	314.447
BN-100-2	NaCl	SSP272	1630	2	69495	ATGCGCAG+CCTAGAGT	8995738	149.929
BN-100-3	NaCl	SSP272	1630	2	69496	ATGCGCAG+GCGTAAGA	11980884	199.681
BN-100-4	NaCl	SSP272	1630	2	66909	ATGCGCAG+CTATTAAG	8211272	136.855
BN-100-5	NaCl	SSP272	1630	2	69497	ATGCGCAG+AAGGCTAT	8737517	145.625
BN-100-6	NaCl	SSP272	1630	2	66911	ATGCGCAG+GAGCCTTA	16099356	268.323
BN-100-7	NaCl	SSP272	1630	2	69498	ATGCGCAG+TTATGCGA	7194653	119.911
BY-100-6	YPD	SSP272	1630	2	66922	ACTGAGCG+TTCTAGCT	11660498	194.342
BY-100-7	YPD	SSP272	1630	2	66923	ACTGAGCG+CCTAGAGT	12692958	211.549
L177	larvae	SSP309; Pop R1; Clone 1	1455	2	55854	ACTCGCTA+CCTAGAGT	6001563	100.026
L178	larvae	SSP309; Pop R1; Clone 2	1455	2	55855	ACTCGCTA+GCGTAAGA	5650879	94.1813
L179	larvae	SSP309; Pop R1; Clone 3	1455	2	55856	ACTCGCTA+CTATTAAG	3715812	61.9302
L180	larvae	SSP309; Pop R1; Clone 4	1455	2	55857	ACTCGCTA+AAGGCTAT	4050344	67.5057
L181	larvae	SSP309; Pop R1; Clone 5	1455	2	55858	ACTCGCTA+GAGCCTTA	4710032	78.5005
L182	larvae	SSP309; Pop R1; Clone 6	1455	2	55859	ACTCGCTA+TTATGCGA	3902890	65.0482
L183	larvae	SSP309; Pop R1; Clone 7	1455	2	55860	GGAGCTAC+TCGACTAG	6865594	114.427
L184	larvae	SSP309; Pop R1; Clone 8	1455	2	55861	GGAGCTAC+TTCTAGCT	6403310	106.722
L185	larvae	SSP309; Pop R1; Clone 9	1455	2	55862	GGAGCTAC+CCTAGAGT	6447589	107.46
L186	larvae	SSP309; Pop R1; Clone 10	1455	2	55863	GGAGCTAC+GCGTAAGA	4688811	78.1469
L187	larvae	SSP309; Pop R2; Clone 1	1455	2	55864	GGAGCTAC+CTATTAAG	5418980	90.3163
L188	larvae	SSP309; Pop R2; Clone 2	1455	2	55865	GGAGCTAC+AAGGCTAT	4165936	69.4323
L189	larvae	SSP309; Pop R3; Clone 1	1455	2	55866	GGAGCTAC+GAGCCTTA	3140041	52.334
L190	larvae	SSP309; Pop R3; Clone 2	1455	2	55867	GGAGCTAC+TTATGCGA	3531460	58.8577
L191	larvae	SSP309; Pop R4; Clone 1	1455	2	55868	GCGTAGTA+TCGACTAG	8988358	149.806
L192	larvae	SSP309; Pop R4; Clone 2	1455	2	55869	GCGTAGTA+TTCTAGCT	9650826	160.847
L193	larvae	SSP309; Pop R5; Clone 1	1455	2	55870	GCGTAGTA+CCTAGAGT	10194631	169.911
L194	larvae	SSP309; Pop R5; Clone 2	1455	2	55871	GCGTAGTA+GCGTAAGA	12596159	209.936
L195	larvae	SSP309; Pop R6; Clone 1	1455	2	55872	GCGTAGTA+CTATTAAG	6858238	114.304
L196	larvae	SSP309; Pop R6; Clone 2	1455	2	55873	GCGTAGTA+AAGGCTAT	5812610	96.8768
L197	larvae	SSP309; Pop R7; Clone 1	1455	2	55874	GCGTAGTA+GAGCCTTA	4392668	73.2111
L198	larvae	SSP309; Pop R7; Clone 2	1455	2	55875	GCGTAGTA+TTATGCGA	4958857	82.6476
L199	larvae	SSP309; Pop R8; Clone 1	1455	2	55876	CGGAGCCT+TCGACTAG	9085009	151.417
L200	larvae	SSP309; Pop R8; Clone 2	1455	2	55877	CGGAGCCT+TTCTAGCT	5755963	95.9327
SSP24	haploid ancestor; Chinese parent		1647	1	69521	TACGCTGC+TCGACTAG	5863337	97.7223
SSP245	haploid ancestor; Clinical parent; ho::NAT		1647	1	69522	TACGCTGC+CCTAGAGT	8232391	137.207
SSP253	haploid ancestor; Clinical parent; ho::KanMX		1647	1	66958	TACGCTGC+TTCTAGCT	7033691	117.228
SSP264	haploid ancestor; Oak parent		1647	1	69523	TACGCTGC+GCGTAAGA	9468995	157.817
SSP272	ancestor, LHL	SSP245 x SSP264	1647	1	66956	CGGAGCCT+TTATGCGA	11793609	196.56
SSP309_invitro	ancestor, HHL	SSP24 x SSP253	1647	1	66955	CGGAGCCT+GAGCCTTA	7693291	128.222
SSP309_invivo_anc	ancestor	SSP24 x SSP253	1455	2	55852	ACTCGCTA+TCGACTAG	6094760	101.579
SSP330	ancestor; RFP labeled via FASTERMT at Mata	SSP24 x SSP253	1455	2	55853	ACTCGCTA+TTCTAGCT	5413280	90.2213
							735547602	157.168
							183886900500
